# Supplementary material
Source: PubMed Central journal article supplement (PMC5187719)
Supplement: pnas.1611051113.sapp.pdf [file pnas.1611051113.sapp.pdf]

# ***Nitrosomonas europaea* Cytochrome P460 Is a Direct Link between Nitrification and Nitrous Oxide Emission**

*Jonathan D. Caranto, Avery C. Vilbert, and Kyle M. Lancaster \**

Department of Chemistry and Chemical Biology, Baker Laboratory, Cornell University, Ithaca,  
NY 14853

## **SUPPORTING INFORMATION APPENDIX**

|                              |            |
|------------------------------|------------|
| <b>Materials and Methods</b> | <b>S2</b>  |
| <b>Supplementary Figures</b> | <b>S5</b>  |
| <b>Supplementary Tables</b>  | <b>S11</b> |
| <b>References</b>            | <b>S11</b> |

## Materials and Methods

**General Considerations.** Milli-Q water (18.2 M $\Omega$ ; Millipore) was used in the preparation of all buffers and solutions. Disodium 1-(Hydroxyl-NNO-azoxy)-L-proline (PROLI-NONOate), and disodium diazen-1-ium-1,2,2 triolate ( $\text{Na}_2\text{N}_2\text{O}_3$ , Angeli's salt) were purchased from Cayman Chemicals. Hydroxylamine hydrochloride ( $\text{NH}_2\text{OH}\cdot\text{HCl}$ ) was purchased from Sigma Aldrich. All other chemicals were purchased from VWR International and used as obtained. A stock solution of PROLI-NONOate was prepared by dissolving 10 mg of PROLI-NONOate in 0.01 M NaOH. The concentration was measured spectrophotometrically ( $\epsilon_{252\text{nm}} = 8400 \text{ M}^{-1} \text{ cm}^{-1}$ ). Nitric oxide (NO) release from PROLI-NONOate was quantified by using  $\text{Na}_2[\text{Fe}^{\text{II}}(\text{EDTA})]$  to form  $\text{Fe}(\text{EDTA})\text{-NO}$  complex ( $\epsilon_{440\text{nm}} = 900 \text{ M}^{-1} \text{ cm}^{-1}$ ; EDTA = ethylenediaminetetraacetic acid) (1). Stock solutions of  $\text{Na}_2\text{N}_2\text{O}_3$  were prepared by dissolving 40 mM  $\text{Na}_2\text{N}_2\text{O}_3$  in 0.01 M NaOH. The exact concentration of  $\text{Na}_2\text{N}_2\text{O}_3$  was measured spectrophotometrically ( $\epsilon_{237\text{nm}} = 6100 \text{ M}^{-1} \text{ cm}^{-1}$ ) (2). Buffers were deoxygenated by bubbling with  $\text{N}_2$  for at least 30 min. All reactions were prepared in an anaerobic chamber (Coy) with deoxygenated buffers unless otherwise noted. UV-visible (UV-vis) absorption spectra measurements were performed with a Cary 60 UV-vis spectrometer. Data were fit using Igor Pro version 6.37 (WaveMetrics).

**Protein Expression and Purification.** A gene encoding *Nitrosomonas europaea* cytochrome (cyt) P460 was codon-optimized for *Escherichia coli* (*E. coli*), synthesized, and cloned into the pET22b (+) vector by GenScript, Inc. Cyt P460 was expressed and purified as described by Elmore (3) with slight modification. The expression plasmid and pEC86 containing the cyt *c* maturation genes *ccmABCDEFGHIH* (4) (provided by H. B. Gray) were co-transformed into *E. coli* strain BL21(DE3) with selection on lysogeny broth plates supplemented with 100  $\mu\text{g mL}^{-1}$  each ampicillin and chloramphenicol. A single colony each was used to inoculate two 3 mL lysogeny broth starter cultures containing 100  $\mu\text{g mL}^{-1}$  ampicillin and chloramphenicol. These starter cultures were incubated with shaking at 37 °C for 6 h and used to inoculate two 6 L culture flasks containing 2.5 L Terrific Broth medium and 0.5% glycerol (0.1% inoculum). The cultures were grown at 30 °C until the optical density at 600 nm reached 0.7, at which point expression was induced by adding isopropyl  $\beta$ -D-1-thiogalactopyranoside to a final concentration of 0.4 mM. The cells were harvested via centrifugation 6 to 8 h post-induction to yield a green cell pellet. The cells were then lysed with sonication in 20 mM Tris (pH 8.0) containing 150 mM NaCl and 0.01% Triton X. The green lysate was clarified via centrifugation for 45 min at 35,000  $\times g$  relative centrifugal force. The supernatant was applied to a HisTrap HP Ni affinity column (GE Lifesciences), washed with 20 mM Tris (pH 8.0) containing 150 mM NaCl, and eluted with 20 mM Tris (pH 8.0) containing 150 mM NaCl and 330 mM imidazole. The fractions containing cyt P460 were combined, concentrated and purified to homogeneity using a HiLoad Superdex 75 size-exclusion column equilibrated with a running buffer of 50 mM morpholinepropanesulfonic acid (pH 7.2) containing 150 mM NaCl. Protein purity was evaluated with sodium dodecyl sulfate polyacrylamide gel electrophoresis. Typical purifications yielded Reinheitszahl values ( $R_z$ , or the purity ratio of  $A_{440\text{nm}}/A_{280\text{nm}}$ ) of ca. 1.5.

**Steady-State Activity Assays.** All assays were performed in septum-sealed cuvettes flushed with  $\text{N}_2$  gas.  $\text{NH}_2\text{OH}\cdot\text{HCl}$  (69 mg; 1 mmol) was equilibrated in an anaerobic environment overnight and then dissolved in 1 mL of deoxygenated water to yield a 1 M solution. This solution was serially diluted 20,000-fold in deoxygenated water and assayed by the method of Frear and Burrell (5) for accurate determination of the stock  $\text{NH}_2\text{OH}$  concentration. Final concentrations of 50  $\mu\text{M}$  2,6-dichlorophenolindophenol (DCPIP), 6  $\mu\text{M}$  phenazine methosulfate (PMS), and 1  $\mu\text{M}$  cyt P460 were added to 2 mL of deoxygenated 50 mM sodium phosphate (pH 8.0). The reaction was initiated by adding an appropriate volume of the  $\text{NH}_2\text{OH}$  stock solution to the reaction mixture through the septum with a Hamilton syringe. The reaction progress was followed by

monitoring the absorption of DCPIP at 605 nm. The rate of the first 10% of the total oxidant consumption was determined through linear regression. This rate was converted to the rate of oxidant consumed by using  $\epsilon_{605\text{ nm}} = 20.6\text{ mM}^{-1}\text{cm}^{-1}$  (6). At least three trials for each  $\text{NH}_2\text{OH}$  concentration were averaged and the standard deviations plotted. The initial rates were plotted versus  $\text{NH}_2\text{OH}$  concentration, and the resulting plot was fit using linear regression.

**Pseudo First-Order Kinetics Measurements.** Stock solutions of  $[\text{Ru}(\text{NH}_3)_6]\text{Cl}_3$  were prepared by equilibrating 62 mg of  $[\text{Ru}(\text{NH}_3)_6]\text{Cl}_3$  in the anaerobic chamber overnight.  $[\text{Ru}(\text{NH}_3)_6]\text{Cl}_3$  was then dissolved in 1 mL of deoxygenated water to generate a 200 mM solution. The dependence of  $\text{NH}_2\text{OH}$  on the reaction was measured by monitoring the absorbance of the 455 nm intermediate. Cyt P460 (10  $\mu\text{M}$ ) and  $[\text{Ru}(\text{NH}_3)_6]\text{Cl}_3$  (50  $\mu\text{M}$ ) were combined with 2 mL of 50 mM 4-(2-hydroxyethyl)-1-piperazine-ethanesulphonic acid (HEPES) buffer (pH 8.0) in an anaerobic cuvette. The reaction was initiated by using a Hamilton syringe to add the appropriate volume of  $\text{NH}_2\text{OH} \cdot \text{HCl}$  to the reaction mixture through the septum on the cuvette. Measurements were carried out from 0.2 mM to 10 mM  $\text{NH}_2\text{OH}$ . The formation and decay of the 455 nm intermediate were monitored with full-wavelength kinetic UV-vis absorption scans at intervals of 0.5 min for 0 to 10 min, 1 min from 10 to 20 min, and 2 min from 20 to 40 min. The sum of two exponentials (Equation S1) were fit to the kinetic traces.

$$A_0 + \sum_i^n A_i e^{-k_{\text{obs}(i)} t} \quad (\text{Equation S1})$$

The fits provided observed rate constants ( $k_{\text{obs}}$ ) for each  $\text{NH}_2\text{OH}$  concentration ( $k_{\text{obs}} = k[\text{NH}_2\text{OH}]$ ). The plot of the slower of the two  $k_{\text{obs}}$  versus  $\text{NH}_2\text{OH}$  concentration was fit to a linear equation.

**Generation of  $\{\text{FeNO}\}^6$ .** Cyt P460 (10  $\mu\text{M}$ ) was combined with 2 mL of 200 mM HEPES buffer (pH 8.0) in an anaerobic cuvette. The  $\{\text{FeNO}\}^6$  species was generated using a Hamilton syringe and adding 5  $\mu\text{M}$  aliquots of PROLI-NONOATE to the cuvette until a 1 mol equivalent of the 455 nm species was reached. The titration was monitored with UV-vis spectroscopy. The reaction between the 455 nm “shunted”  $\{\text{FeNO}\}^6$  species and  $\text{NH}_2\text{OH}$  was initiated by using a Hamilton syringe and adding 2 mM  $\text{NH}_2\text{OH}$  to the cuvette containing the  $\{\text{FeNO}\}^6$  species. Full-wavelength UV-vis kinetic traces were measured at intervals of 0.5 min for 10 min, 1 min for 20 min, and 2 min for 40 min.

**Pseudo first order kinetic data for reaction of shunted  $\{\text{FeNO}\}^6$  with  $\text{NH}_2\text{OH}$ :** The  $\{\text{FeNO}\}^6$  species was prepared as stated above. Cyt P460 (30 $\mu\text{M}$ ) and 1 equiv. of PROLI-NONOATE (60 $\mu\text{M}$  NO) were combined with 2mL of 200mM HEPES buffer (pH 8.0) in a septum-sealed cuvette. The reaction between the shunted  $\{\text{FeNO}\}^6$  and  $\text{NH}_2\text{OH}$  was initiated by using a Hamilton syringe and adding the appropriate volume of  $\text{NH}_2\text{OH} \cdot \text{HCl}$  to the cuvette. Measurements were carried out between 2 mM and 8 mM  $\text{NH}_2\text{OH}$ . The dependence of  $\text{NH}_2\text{OH}$  on the shunted  $\{\text{FeNO}\}^6$  was measured by monitoring the absorbance at 455nm. The decay of the  $\{\text{FeNO}\}^6$  species was monitored with full-wavelength kinetic UV/vis absorption scans at intervals of 0.5 min for 10min, 1 min for 20 min and 2 min for 40 min. Single exponential functions (equation S1,  $n = 1$ ) were fit to the data. Observed rate constants ( $k_{\text{obs}}$ ) from the provided fits for each concentration of  $\text{NH}_2\text{OH}$  ( $k_{\text{obs}} = k[\text{NH}_2\text{OH}]$ ) were then plotted against  $\text{NH}_2\text{OH}$  concentration. The  $k_{\text{obs}}$  versus  $\text{NH}_2\text{OH}$  concentration plot was then fit using linear regression in IGOR Pro 6.37.

**Generation of the  $\{\text{FeNO}\}^7$ .** Cyt P460 (10  $\mu\text{M}$ ) was combined with 2 mL of 200 mM HEPES buffer (pH 8.0) in an anaerobic cuvette. Cyt P460 (10 $\mu\text{M}$ ) was incubated with 50  $\mu\text{M}$   $\text{Na}_2\text{N}_2\text{O}_3$  to generate the  $\{\text{FeNO}\}^7$  species.  $[\text{Ru}(\text{NH}_3)_6]\text{Cl}_3$  (100  $\mu\text{M}$ ) was added to the  $\{\text{FeNO}\}^7$  and monitored

by UV-vis (200 to 800 nm) at intervals of 0.5 min for 10 min and 1 min for 20 min. The reactivity of  $\{\text{FeNO}\}^7$  with  $\text{NH}_2\text{OH}$  was also measured. The  $\{\text{FeNO}\}^7$  species was generated as described above, and the reaction was initiated with 10 mM  $\text{NH}_2\text{OH}$ . The reaction was monitored by UV-vis (200 to 800 nm) at intervals of 0.5 min for 10 min and 1 min for 20 min.

**Measurement of  $\text{N}_2\text{O}$ .** All reactions were prepared and sealed in 5 mL headspace gas chromatography (GC) vials (Wheaton). The concentration of formed  $\text{N}_2\text{O}$  was analyzed with GC (Agilent) or GC–mass spectroscopy (GC–MS; JEOL GC-MATE II), or an  $\text{N}_2\text{O}$  microsensor housed within a septum-piercing needle (Unisense). The  $\text{N}_2\text{O}$  concentration was measured in the headspace of solutions containing cyt P460 (5  $\mu\text{M}$ ), PMS (1 mM), and various amounts of  $\text{NH}_2\text{OH}$ . The headspace was measured with GC analysis using a Supel-Q PLOT column (30 mm  $\times$  0.32 mm). The concentration of  $\text{N}_2\text{O}$  formed during the  $\{\text{FeNO}\}^6$  shunted experiments was measured with GC-MS using an RT Q bond column. GC-MS samples (500  $\mu\text{L}$ ) were prepared in a Coy chamber with 1.5 mL headspace vials (Agilent). The  $\{\text{FeNO}\}^6$  was generated by incubating cyt P460 (5  $\mu\text{M}$ ) and various amounts of PROLI-NONOATE. The reaction was initiated by adding 10 mM  $^{14}\text{NH}_2\text{OH}$  or  $^{15}\text{NH}_2\text{OH}$  and was allowed to react in the Coy chamber for 2 h. After 2 h, the reaction was quenched with 1 M phosphoric acid.

**Electron Paramagnetic Resonance (EPR).** The protein concentration used was 0.3 mM in 200 mM HEPES (pH 8.0) with 25% (v/v) glycerol. The EPR spectra were recorded at X-band (9.40 GHz) on a Bruker Eleksys-II spectrometer equipped with a liquid He cryostat maintained at 10 or 20 K. EPR data were simulated, and spin concentrations were determined by using SpinCount (7).

**Measurement of  $k_{\text{obs}}$  for oxidation of  $\text{Fe}^{\text{II}}$  cyt P460 by stopped-flow spectrophotometry.** As isolated cyt P460 was treated with 0.5 equivalents of  $\text{Na}_2\text{S}_2\text{O}_4$  (dithionite) to produce  $\text{Fe}^{\text{II}}$  cyt P460. The stopped-flow experiments were performed using a Bio-Logic SFM-300 with light monochromated to 463 nm and monitored using a photomultiplier tube (Bio-Logic Science Instruments SAS).  $\text{O}_2$  in the mixing circuit was scavenged by treatment with 10 mM  $\text{Na}_2\text{S}_2\text{O}_4$  for one hour. Excess  $\text{Na}_2\text{S}_2\text{O}_4$  was then washed out with 4x5 ml of degassed 50 mM sodium phosphate, pH 8.0 or degassed water. 90  $\mu\text{M}$  of  $\text{Fe}^{\text{II}}$  cyt P460 in 50 mM sodium phosphate, pH 8.0 was anaerobically loaded into the stopped-flow mixing circuit and mixed 1:1 (v/v) with either 2 mM  $[\text{Ru}(\text{NH}_3)_6]\text{Cl}_3$  or 4 mM  $\text{NH}_2\text{OH}$  in degassed water. The  $\text{Fe}^{\text{II}}$  cyt P460 vs. 1 mM NO was performed as a sequential mixing experiment where a 4 mM stock solution of PROLI-NONOate was pre-mixed 1:1 (v/v) with 250 mM sodium phosphate, pH 8.0 and allowed to decay in the delay line for 30 seconds. The resulting 2 mM NO solution was then mixed 1:1 (v/v) against 90  $\mu\text{M}$  of  $\text{Fe}^{\text{II}}$  cyt P460 in second mixing step. For all experiments, the consumption of  $\text{Fe}^{\text{II}}$  cyt P460 was monitored by the loss of the 463-nm absorption band corresponding to the Soret peak of  $\text{Fe}^{\text{II}}$  cyt P460. All experiments were performed at 25  $^\circ\text{C}$ .

## Supplementary Figures

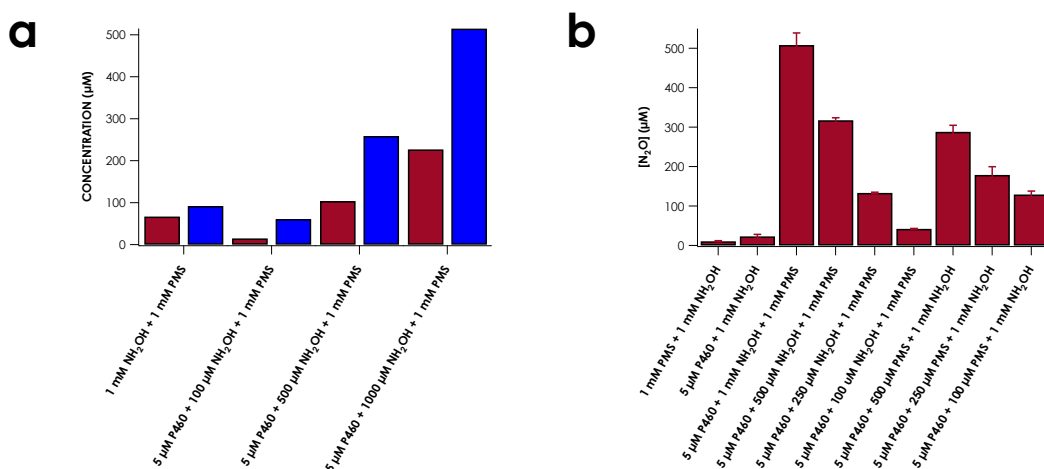

**Fig. S1.** N<sub>2</sub>O and NO<sub>2</sub><sup>-</sup> production by cytochrome (cyt) P460 under either (a) aerobic or (b) anaerobic conditions and with varying NH<sub>2</sub>OH and oxidant concentrations. NO<sub>2</sub><sup>-</sup> concentration (blue bars) was measured by UV/vis absorption spectrometry after treatment of the sample with Griess reagent. N<sub>2</sub>O concentration (red bars) was monitored with gas chromatography. No blue bars are shown for the anaerobic experiments as NO<sub>2</sub><sup>-</sup> was never detected under these conditions. Data points in (b) are averages of triplicate reactions of 5 μM cyt P460 in anaerobic 50 mM 4-(2-hydroxyethyl)-1-piperazine-ethanesulphonic acid (HEPES), pH 8.0, at 25 °C overnight. Error bars in (b) represent one standard deviation of three trials.

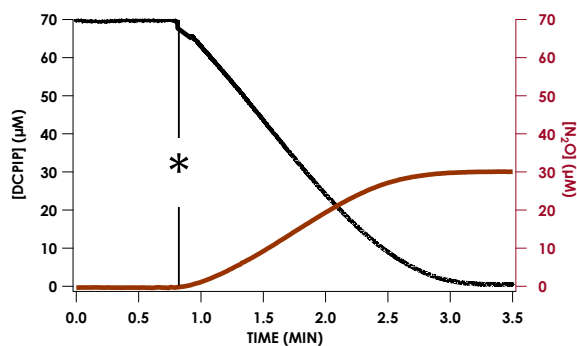

**Fig. S2.** Representative time courses of 2,6-dichlorophenolindophenol (DCPIP) consumption (black trace) and N<sub>2</sub>O production (red trace) during the reaction of 1 μM cyt P460 with 5 mM NH<sub>2</sub>OH and 70 μM DCPIP in anaerobic 50 mM phosphate, pH 8.0, at 25 °C. The reaction was initiated by the addition of 5mM NH<sub>2</sub>OH at the time point indicated by (\*). Consumption of DCPIP was monitored by its absorbance at 605 nm. N<sub>2</sub>O production was measured with an N<sub>2</sub>O-selective electrode. Initial rates were measured through fitting to a linear equation. Initial rates showed a DCPIP consumption rate of 40 μM min<sup>-1</sup> and an N<sub>2</sub>O production rate of 20 μM min<sup>-1</sup>.

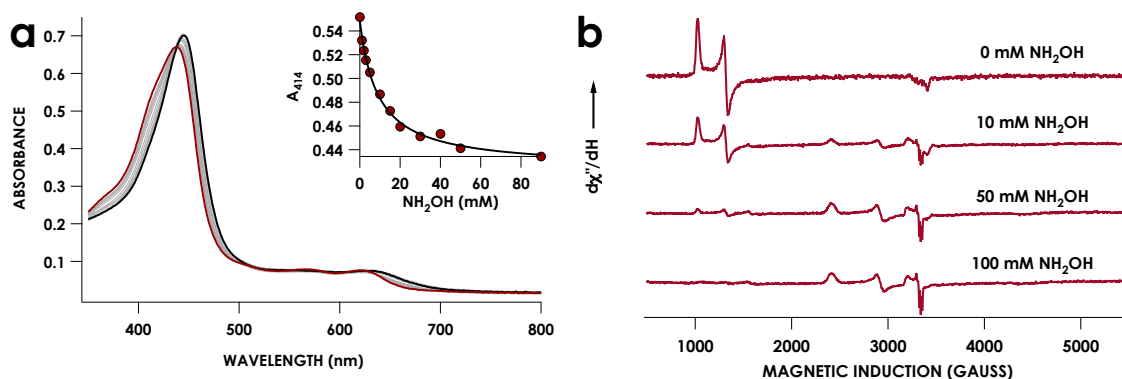

**Fig. S3.** Cyt P460 and  $\text{NH}_2\text{OH}$  titration curve as monitored by (a) UV/visible (UV/vis) absorption and (b) electron paramagnetic resonance (EPR) spectroscopy. (a) UV-vis traces of  $12 \mu\text{M}$  cyt P460 titrated with various amounts of  $\text{NH}_2\text{OH}$  in anaerobic  $50 \text{ mM}$  sodium phosphate, pH 8.0, at  $25^\circ\text{C}$ . Inset shows a plot of  $A_{414 \text{ nm}}$  versus  $\text{NH}_2\text{OH}$  concentration with a fit generated using the following hyperbolic equation:  $A_{414 \text{ nm}} = \frac{\Delta A_{414 \text{ nm}}[\text{NH}_2\text{OH}]_0}{K_d + [\text{NH}_2\text{OH}]_0}$ . (b) EPR spectra of  $170 \mu\text{M}$  cyt P460 mixed with 0, 10, 50, or 100 mM  $\text{NH}_2\text{OH}$  in anaerobic  $50 \text{ mM}$  sodium phosphate, pH 8.0. The spectra were collected at 10 K and a microwave power of  $6 \mu\text{W}$ . Table ST1 shows the concentration of each EPR signal as determined through simulation.

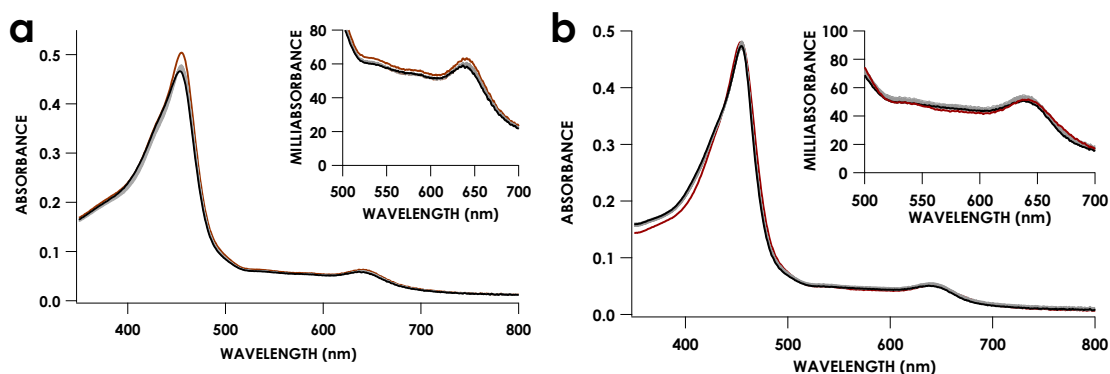

**Fig. S4.** UV/vis absorption spectrum of  $10 \mu\text{M}$  cyt P460 incubated with  $50 \mu\text{M}$   $\text{Na}_2\text{N}_2\text{O}_3$  for 30 min and then reacted with either (a)  $\text{NH}_2\text{OH}$  or (b)  $[\text{Ru}(\text{NH}_3)_6]\text{Cl}_3$ . All reactions were performed in anaerobic  $200 \text{ mM}$  HEPES, pH 8.0, at  $25^\circ\text{C}$ .

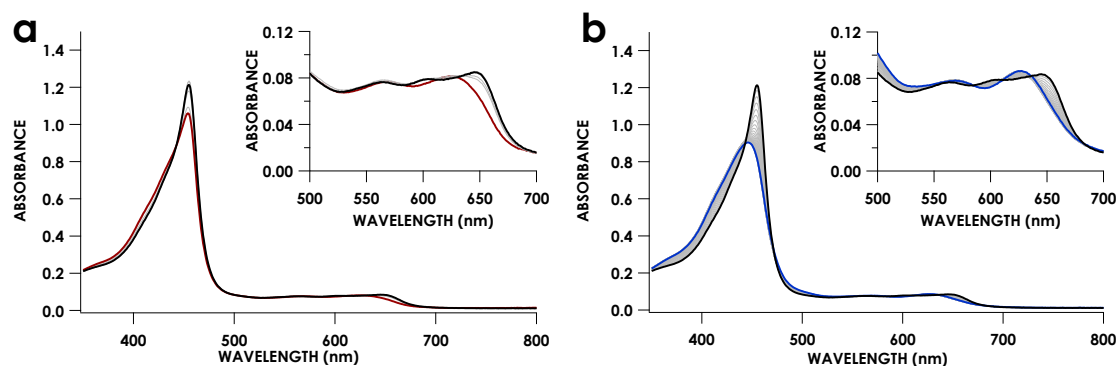

**Figure S5.** Representative UV/vis absorption spectral time courses of the (a) accumulation and (b) decay of the 455 nm intermediate during the reaction of 10  $\mu\text{M}$  cyt P460, 200  $\mu\text{M}$   $[\text{Ru}(\text{NH}_3)_6]\text{Cl}_3$ , and 6 mM  $\text{NH}_2\text{OH}$  in anaerobic 50 mM HEPES, pH 8.0, at 25  $^\circ\text{C}$ . The reaction was initiated by the addition of  $[\text{Ru}(\text{NH}_3)_6]\text{Cl}_3$ . The red trace in (a) is the UV/vis spectrum collected immediately after the addition of  $\text{NH}_2\text{OH}$ , and the black trace is the accumulated 455 nm intermediate. The blue trace in (b) is the spectrum of the decay product. The insets in both figures highlight the Q-band region.

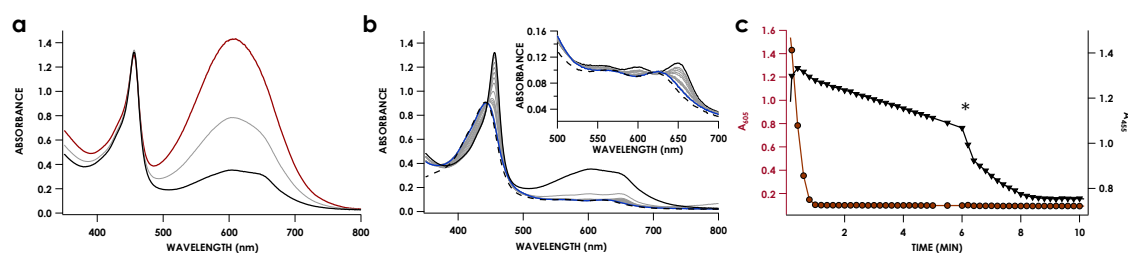

**Figure S6.** Representative spectral time courses of the (a) accumulation and (b) decay of the 455 nm intermediate during the reaction of 12  $\mu\text{M}$  cyt P460 with 1 mM  $\text{NH}_2\text{OH}$  and 70  $\mu\text{M}$  DCPIP in anaerobic 50 mM sodium phosphate, pH 8.0, at 25  $^\circ\text{C}$ . The reaction was initiated by the addition of 1 mM  $\text{NH}_2\text{OH}$ . (b) Representative spectral time course of the decay of the 455 nm intermediate before and after adding another 10 mM  $\text{NH}_2\text{OH}$ . In kinetic traces of the decay of the 455 nm intermediate, black is the accumulated intermediate and blue is the final decay product. The inset highlights the Q-band region. The dashed spectrum shows the product of incubating cyt P460 with 10 mM  $\text{NH}_2\text{OH}$ . (c) Representative 455 and 605 nm traces following the accumulation and decay of the 455 nm intermediate (red trace) and the consumption of DCPIP (black trace). The asterisk indicates the addition of 10 mM  $\text{NH}_2\text{OH}$  to the 455 nm intermediate once the DCPIP has been consumed.

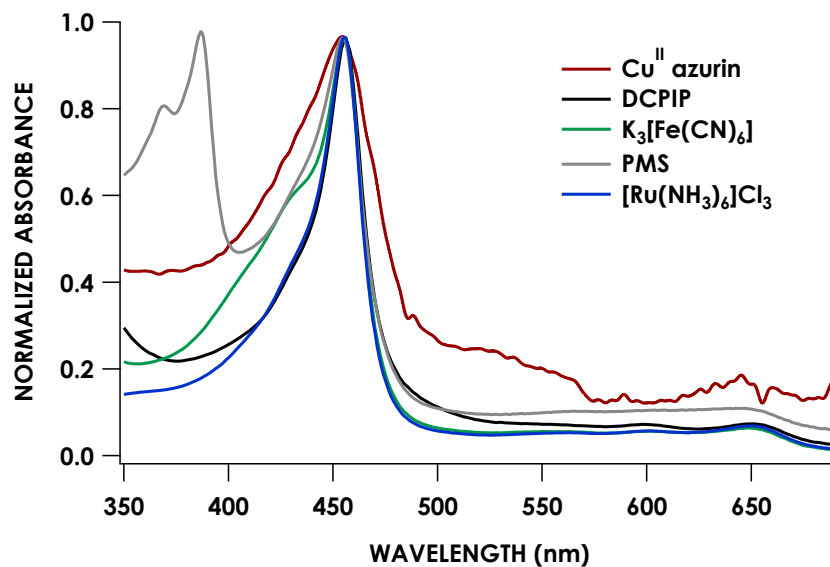

**Fig. S7.** UV/vis absorption spectra of 455 nm intermediate prepared with various oxidants.

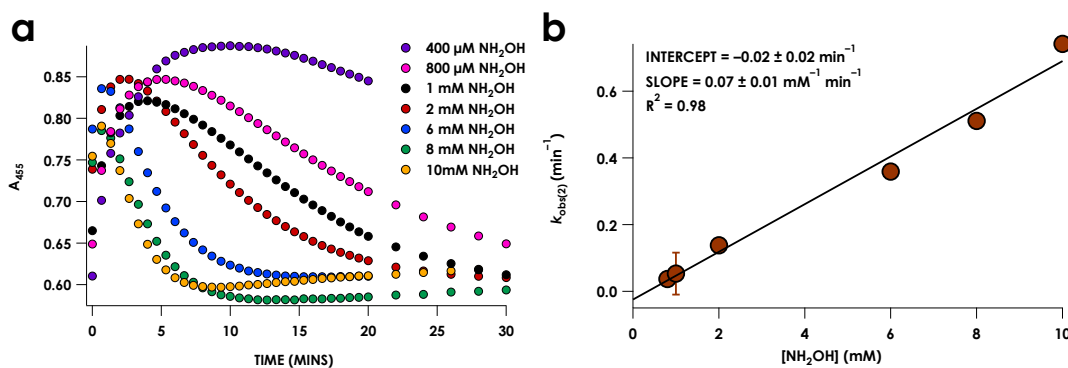

**Fig. S8.** (a) Representative  $A_{455 \text{ nm}}$  traces monitoring the reaction of cyt P460 (10  $\mu\text{M}$ ), and  $[\text{Ru}(\text{NH}_3)_6]\text{Cl}_3$  (100  $\mu\text{M}$ ) with varying  $\text{NH}_2\text{OH}$  concentrations. (b) Plot of  $k_{\text{obs}2}$  determined by fitting Equation S1 to traces in panel a versus  $\text{NH}_2\text{OH}$  concentration.



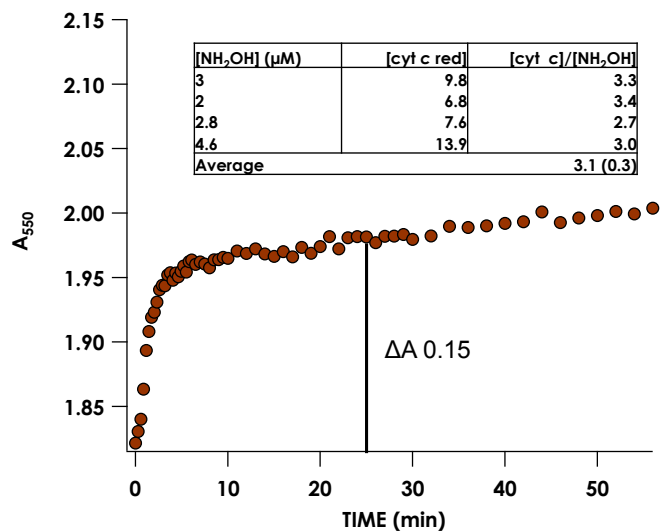

**Figure S9.** A 550 nm trace monitoring the reduction of cyt *c* in the presence of NH<sub>2</sub>OH at sub-stoichiometric concentrations relative to cyt P460. Final reaction conditions: 15 μM cyt P460, 23 μM cyt *c* in anaerobic sodium phosphate, pH 8.0 at 25 °C. The reaction was initiated by adding 2.8 μM NH<sub>2</sub>OH.

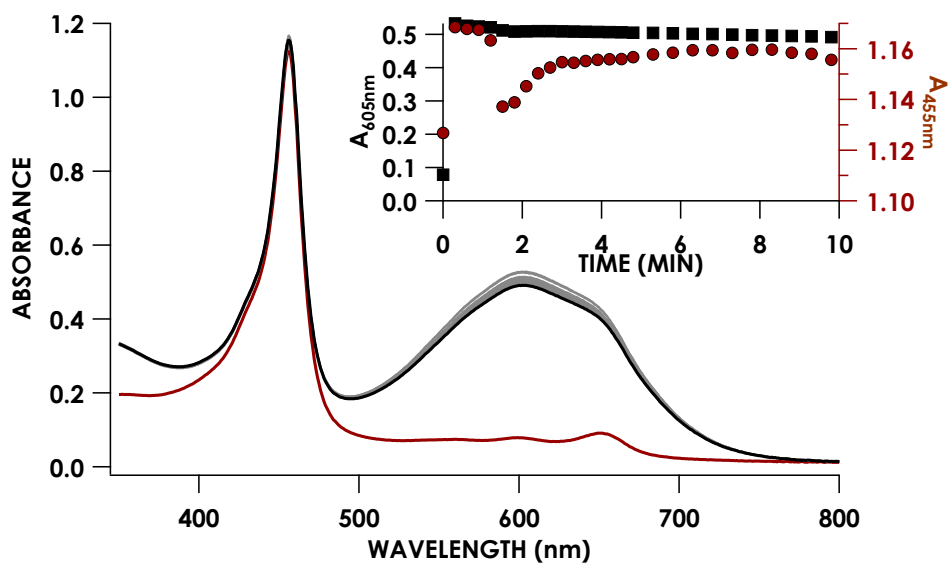

**Fig. S10.** UV-vis spectrum demonstrating the stability of {FeNO}<sup>6</sup> with DCPIP. Treatment of cyt P460 (16 μM) and 1 equiv. of NO generates the {FeNO}<sup>6</sup> species (red trace). 30 μM DCPIP is subsequently added. The inset single-wavelength traces follow the absorbance at 605 nm for DCPIP (black squares) and the absorbance of the 455 nm intermediate (red circles).

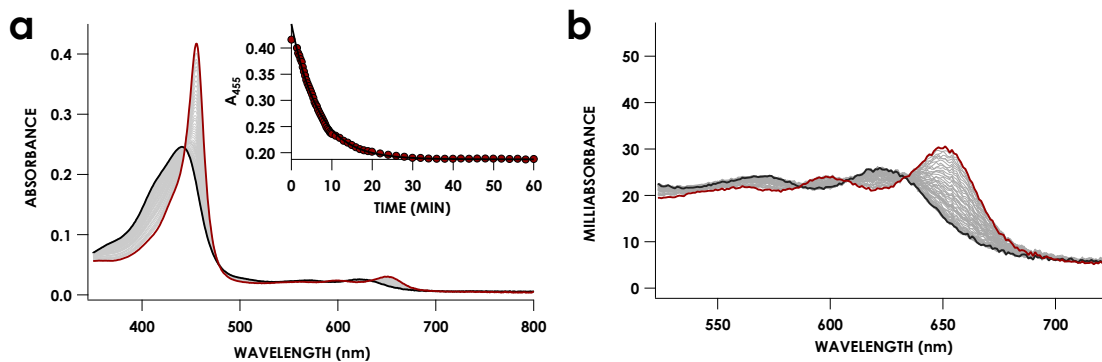

**Fig. S11.** Reaction of  $\{\text{FeNO}\}^6$  formed via the NO shunt with  $\text{NH}_2\text{OH}$ . The  $\{\text{FeNO}\}^6$  species was generated with  $5 \mu\text{M}$  cyt P460 and  $16 \mu\text{M}$  PROLI-NONOate in anaerobic  $200 \text{ mM}$  HEPES, pH 8.0. The decay of  $\{\text{FeNO}\}^6$  was initiated by addition of a final concentration of  $2 \text{ mM}$   $\text{NH}_2\text{OH}$  and followed by observing the decay of the  $455 \text{ nm}$  Soret peak. (a) UV/vis absorption spectral time course of decay of the  $455 \text{ nm}$  (red) Soret peak to the  $\text{Fe}^{\text{III}}\text{-NH}_2\text{OH}$  adduct (black). Inset shows the  $A_{455 \text{ nm}}$  trace. (b) Expansion of the Q-band region. Experiments were performed at  $25 \text{ }^\circ\text{C}$  at pH 8.0.

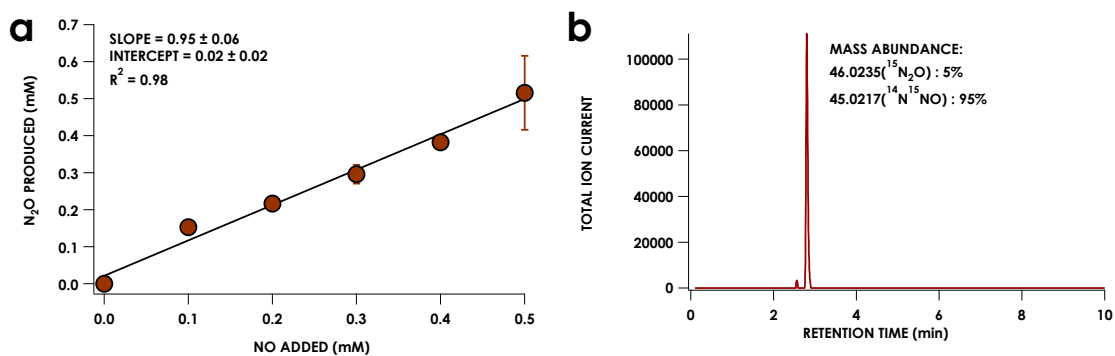

**Fig. S12.** Gas chromatography mass spectroscopy (GC-MS) analysis of  $\{\text{FeNO}\}^6$  shunt experiments with the addition of  $10 \text{ mM}$   $\text{NH}_2\text{OH}$ . The  $\{\text{FeNO}\}^6$  was generated by mixing  $5 \mu\text{M}$  cyt P460 with varying amounts of PROLI-NONOate. The reaction was initiated by the addition of  $10 \text{ mM}$   $\text{NH}_2\text{OH}$ . (a) Stoichiometry results of the GC-MS analysis showing a 1:1 ratio of added NO to produced  $\text{N}_2\text{O}$ . (b) MS chromatogram showing that the reaction of  $^{15}\text{NH}_2\text{OH}$  with  $\{\text{FeNO}\}^6$  P460 generated using  $^{14}\text{NO}$  produces only mixed-isotope  $\text{N}_2\text{O}$ .

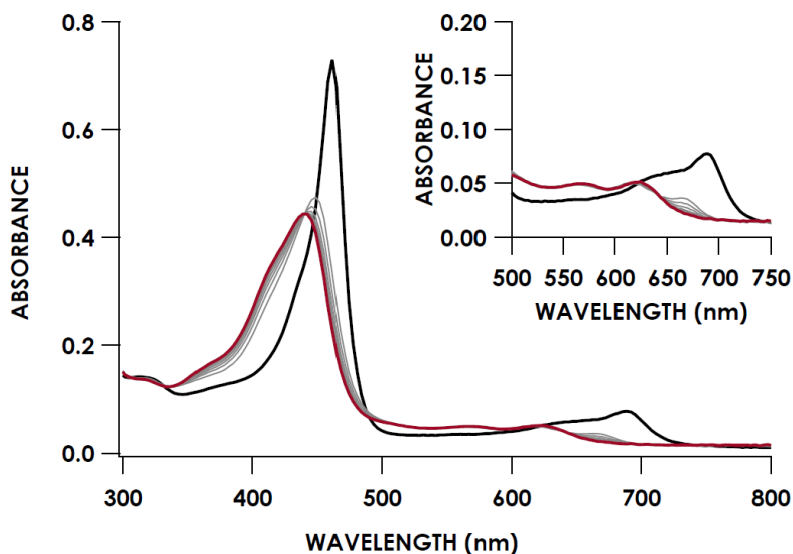

**Fig. S13.** UV/vis absorption spectral time course of 30  $\mu\text{M}$   $\text{Fe}^{\text{II}}$  cyt P460 mixed with 10 mM  $\text{NH}_2\text{OH}$  in anaerobic 50 mM sodium phosphate, pH 8.0 at 25  $^\circ\text{C}$ . The black spectrum is the spectrum of the  $\text{Fe}^{\text{II}}$  cyt P460 before adding  $\text{NH}_2\text{OH}$ . Grey traces are collect every 0.3 seconds after  $\text{NH}_2\text{OH}$  addition. The red spectrum is the final spectrum at 3.0 seconds.

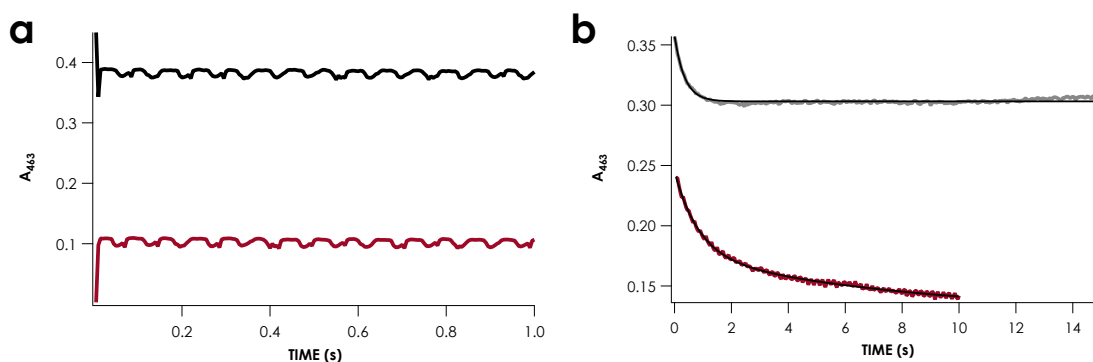

**Fig. S14.** Single-wavelength (463 nm) stopped-flow time courses of  $\text{Fe}^{\text{II}}$  cyt P460 (a) before (black trace) and after (red trace) mixing with 1 mM  $[\text{Ru}(\text{NH}_3)_6]\text{Cl}_3$  and (b) after mixing with 1 mM NO (gray trace) or 2 mM  $\text{NH}_2\text{OH}$  (red trace). Fits to the data are shown in black. Conditions after mixing were 7  $\mu\text{M}$  cyt P460 in anaerobic 50 mM sodium phosphate, pH 8.0 at 25  $^\circ\text{C}$ .

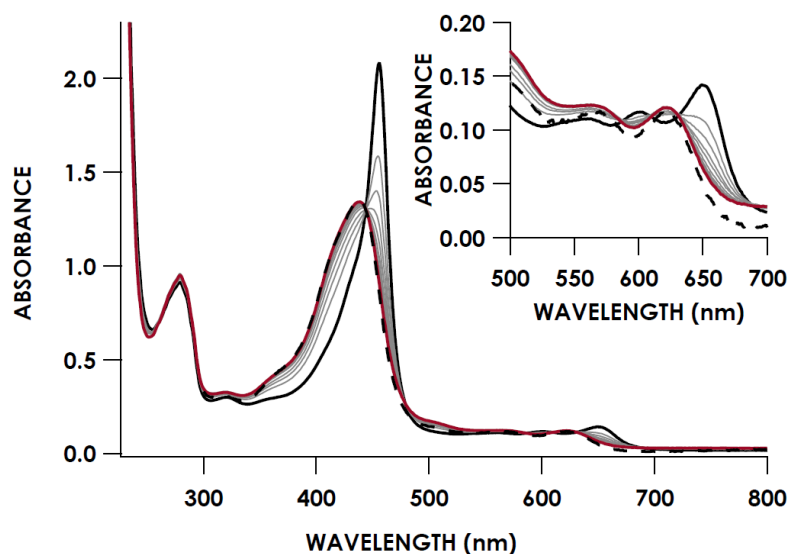

**Fig. S15.** 24-min UV/vis absorption spectral time course of 30  $\mu\text{M}$  as-isolated cyt P460 mixed with 1 equiv. NO that has been exposed to air in 50 mM sodium phosphate, pH 8.0 at 25  $^{\circ}\text{C}$ . Inset shows expanded Q-band region. Solid black trace is the spectrum of the  $\{\text{FeNO}\}^6$  generated from addition of 0.5 equivalents of PROLI-NONOate to the as isolated cyt P460. Grey traces are collected in 2 minute increments after exposure of the sample to air. Red trace is the final spectrum at 24 minutes. Dashed black trace is the spectrum of 30  $\mu\text{M}$  as isolated cyt P460 for comparison.

### Supplementary Tables

**Table ST1.**  $\text{N}_2\text{O}$  production by cyt P460 at varying concentrations of  $\text{NH}_2\text{OH}$  or PMS<sup>a</sup>

| $[\text{NH}_2\text{OH}]$ ( $\mu\text{M}$ ) <sup>b</sup> | $[\text{N}_2\text{O}]$ ( $\mu\text{M}$ ) |
|---------------------------------------------------------|------------------------------------------|
| 0                                                       | 23                                       |
| 100                                                     | 42                                       |
| 250                                                     | 134                                      |
| 500                                                     | 318                                      |
| 1000                                                    | 509                                      |
| $[\text{PMS}]$ ( $\mu\text{M}$ ) <sup>c</sup>           | $[\text{N}_2\text{O}]$ ( $\mu\text{M}$ ) |
| 0                                                       | 23                                       |
| 100                                                     | 129                                      |
| 250                                                     | 179                                      |
| 500                                                     | 288                                      |
| 1000                                                    | 509                                      |
|                                                         | $[\text{N}_2\text{O}]$ ( $\mu\text{M}$ ) |
| 1 mM PMS + 1 mM $\text{NH}_2\text{OH}$                  | 11                                       |

<sup>a</sup>Reaction conditions were 5  $\mu\text{M}$  cyt P460 in anaerobic 50 mM sodium phosphate, pH 8.0 at 37  $^{\circ}\text{C}$

<sup>b</sup> $[\text{NH}_2\text{OH}]$  varied with constant  $[\text{PMS}]$  of 1 mM.

<sup>c</sup> $[\text{PMS}]$  varied with constant  $[\text{NH}_2\text{OH}]$  of 1 mM

**Table ST2.** Oxidation of NH<sub>2</sub>OH by cyt P460 under aerobic conditions.<sup>a</sup>

| [NH <sub>2</sub> OH] <sub>0</sub><br>( $\mu$ M) | [N <sub>2</sub> O]<br>( $\mu$ M) | [NO <sub>2</sub> <sup>-</sup> ]<br>( $\mu$ M) | Total NH <sub>2</sub> OH<br>consumed ( $\mu$ M) | % NH <sub>2</sub> OH<br>converted to N <sub>2</sub> O | % NH <sub>2</sub> OH<br>converted to NO <sub>2</sub> <sup>-</sup> |
|-------------------------------------------------|----------------------------------|-----------------------------------------------|-------------------------------------------------|-------------------------------------------------------|-------------------------------------------------------------------|
| 100                                             | 15                               | 61                                            | 91                                              | 33                                                    | 67                                                                |
| 500                                             | 104                              | 259                                           | 467                                             | 45                                                    | 55                                                                |
| 1000                                            | 227                              | 515                                           | 969                                             | 47                                                    | 53                                                                |

<sup>a</sup>Reaction conditions were 5  $\mu$ M cyt P460, 1 mM PMS in 50 mM sodium phosphate, pH 8.0 at 37 °C

**Table ST3.** Concentrations of spins observed in Figure S3(b).<sup>a</sup>

| [NH <sub>2</sub> OH] (mM) | S = 5/2 ( $\mu$ M)<br>(Fe <sup>III</sup> -OH <sub>2</sub> ) | S = 1/2 ( $\mu$ M)<br>(Fe <sup>III</sup> -NH <sub>2</sub> OH) | {FeNO} <sub>7</sub> ( $\mu$ M) |
|---------------------------|-------------------------------------------------------------|---------------------------------------------------------------|--------------------------------|
| 0                         | 171 (100)                                                   | 0 (0)                                                         | 0 (0)                          |
| 10                        | 82 (50)                                                     | 73 (45)                                                       | 8 (5)                          |
| 50                        | 13 (8)                                                      | 150 (87)                                                      | 8 (5)                          |
| 100                       | 0 (0)                                                       | 160 (95)                                                      | 8 (5)                          |

<sup>a</sup>Parenthetical values indicate the percentage of total Fe in each sample comprised by these species.

**Table ST4.** Spin Hamiltonian parameters from SpinCount (7) simulations of EPR spectra in Fig. 5.

| Species                               | g <sub>1</sub> ( $\sigma$ g <sub>1</sub> ) | g <sub>2</sub> ( $\sigma$ g <sub>2</sub> ) | g <sub>3</sub> ( $\sigma$ g <sub>3</sub> ) | <sup>14</sup> N A <sub>1</sub><br>(MHz) | <sup>14</sup> N A <sub>2</sub><br>(MHz) | <sup>14</sup> N A <sub>3</sub><br>(MHz) | E/D  |
|---------------------------------------|--------------------------------------------|--------------------------------------------|--------------------------------------------|-----------------------------------------|-----------------------------------------|-----------------------------------------|------|
| Fe <sup>III</sup> -OH <sub>2</sub>    | 1.92                                       | 1.96                                       | 2                                          | —                                       | —                                       | —                                       | 0.03 |
| Fe <sup>III</sup> -NH <sub>2</sub> OH | 1.52 (0.06)                                | 2.29 (0.03)                                | 2.78 (0.05)                                | —                                       | —                                       | —                                       | —    |
| {FeNO} <sub>7</sub>                   | 2.012 (0.0002)                             | 2.026 (0.003)                              | 2.098 (0.0002)                             | 50                                      | 57                                      | 45                                      | —    |

## References

- Hayashi T, Caranto JD, Wampler DA, Kurtz Jr DM, Moënne-Loccoz P (2010) Insights into the nitric oxide reductase mechanism of flavodiiron proteins from a flavin-free enzyme. *Biochemistry* 49(33):7040-7049.
- Peyrot F, Fernandez BO, Bryan NS, Feelisch M, & Ducrocq C (2006) N-Nitroso products from the reaction of indoles with Angeli's salt. *Chem Res Toxicol* 19(1):58-67.
- Elmore BO, Pearson AR, Wilmot CM, Hooper AB (2006) Expression, purification, crystallization and preliminary X-ray diffraction of a novel *Nitrosomonas europaea* cytochrome, cytochrome P460. *Acta Crystallogr F* 62(4):395-398.
- Thöny-Meyer L, Fischer F, Künzler P, Ritz D, Hennecke H (1995) *Escherichia coli* genes required for cytochrome c maturation. *J Bacteriol* 177(15):4321-4326.
- Frear D & Burrell R (1955) Spectrophotometric method for determining hydroxylamine reductase activity in higher plants. *Anal Chem* 27(10):1664-1665.
- Williamson G & Engel PC (1984) Butyryl-CoA dehydrogenase from *Megasphaera elsdenii*. Specificity of the catalytic reaction. *Biochem J* 218(2):521-529.
- Golombek AP & Hendrich MP (2003) Quantitative analysis of dinuclear manganese (II) EPR spectra. *J Magn Reson* 165(1):33-48.
